# Supplementary material
Source: Springer Nature journal article supplement (https://www.springermedizin.de/resource/supplementary/13063_2013_2028_MOESM5_ESM.pdf/9621208)
Supplement: MOESM5 [file 9621208]

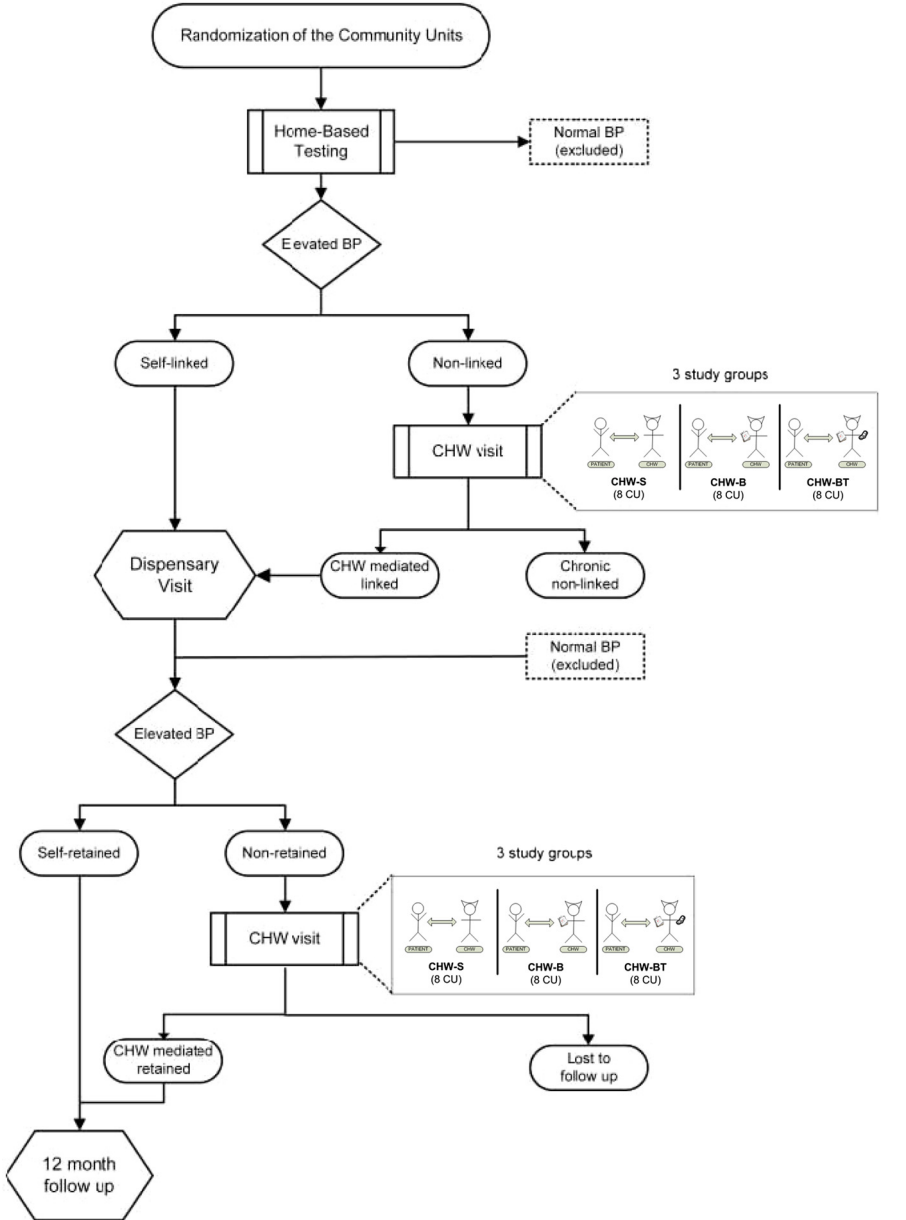

CHW-S = usual care

CHW-B = CHWs with an additional communication strategy

CHW-BT = CHWs with a communication strategy and with smartphone technology
